# Supplementary figures and images for: Vertical distribution of planktonic foraminifera in the Subtropical South Atlantic: depth hierarchy of controlling factors
Source: Copernicus journal article supplement (doi:10.5194/bg-2019-355), 2019-10-09

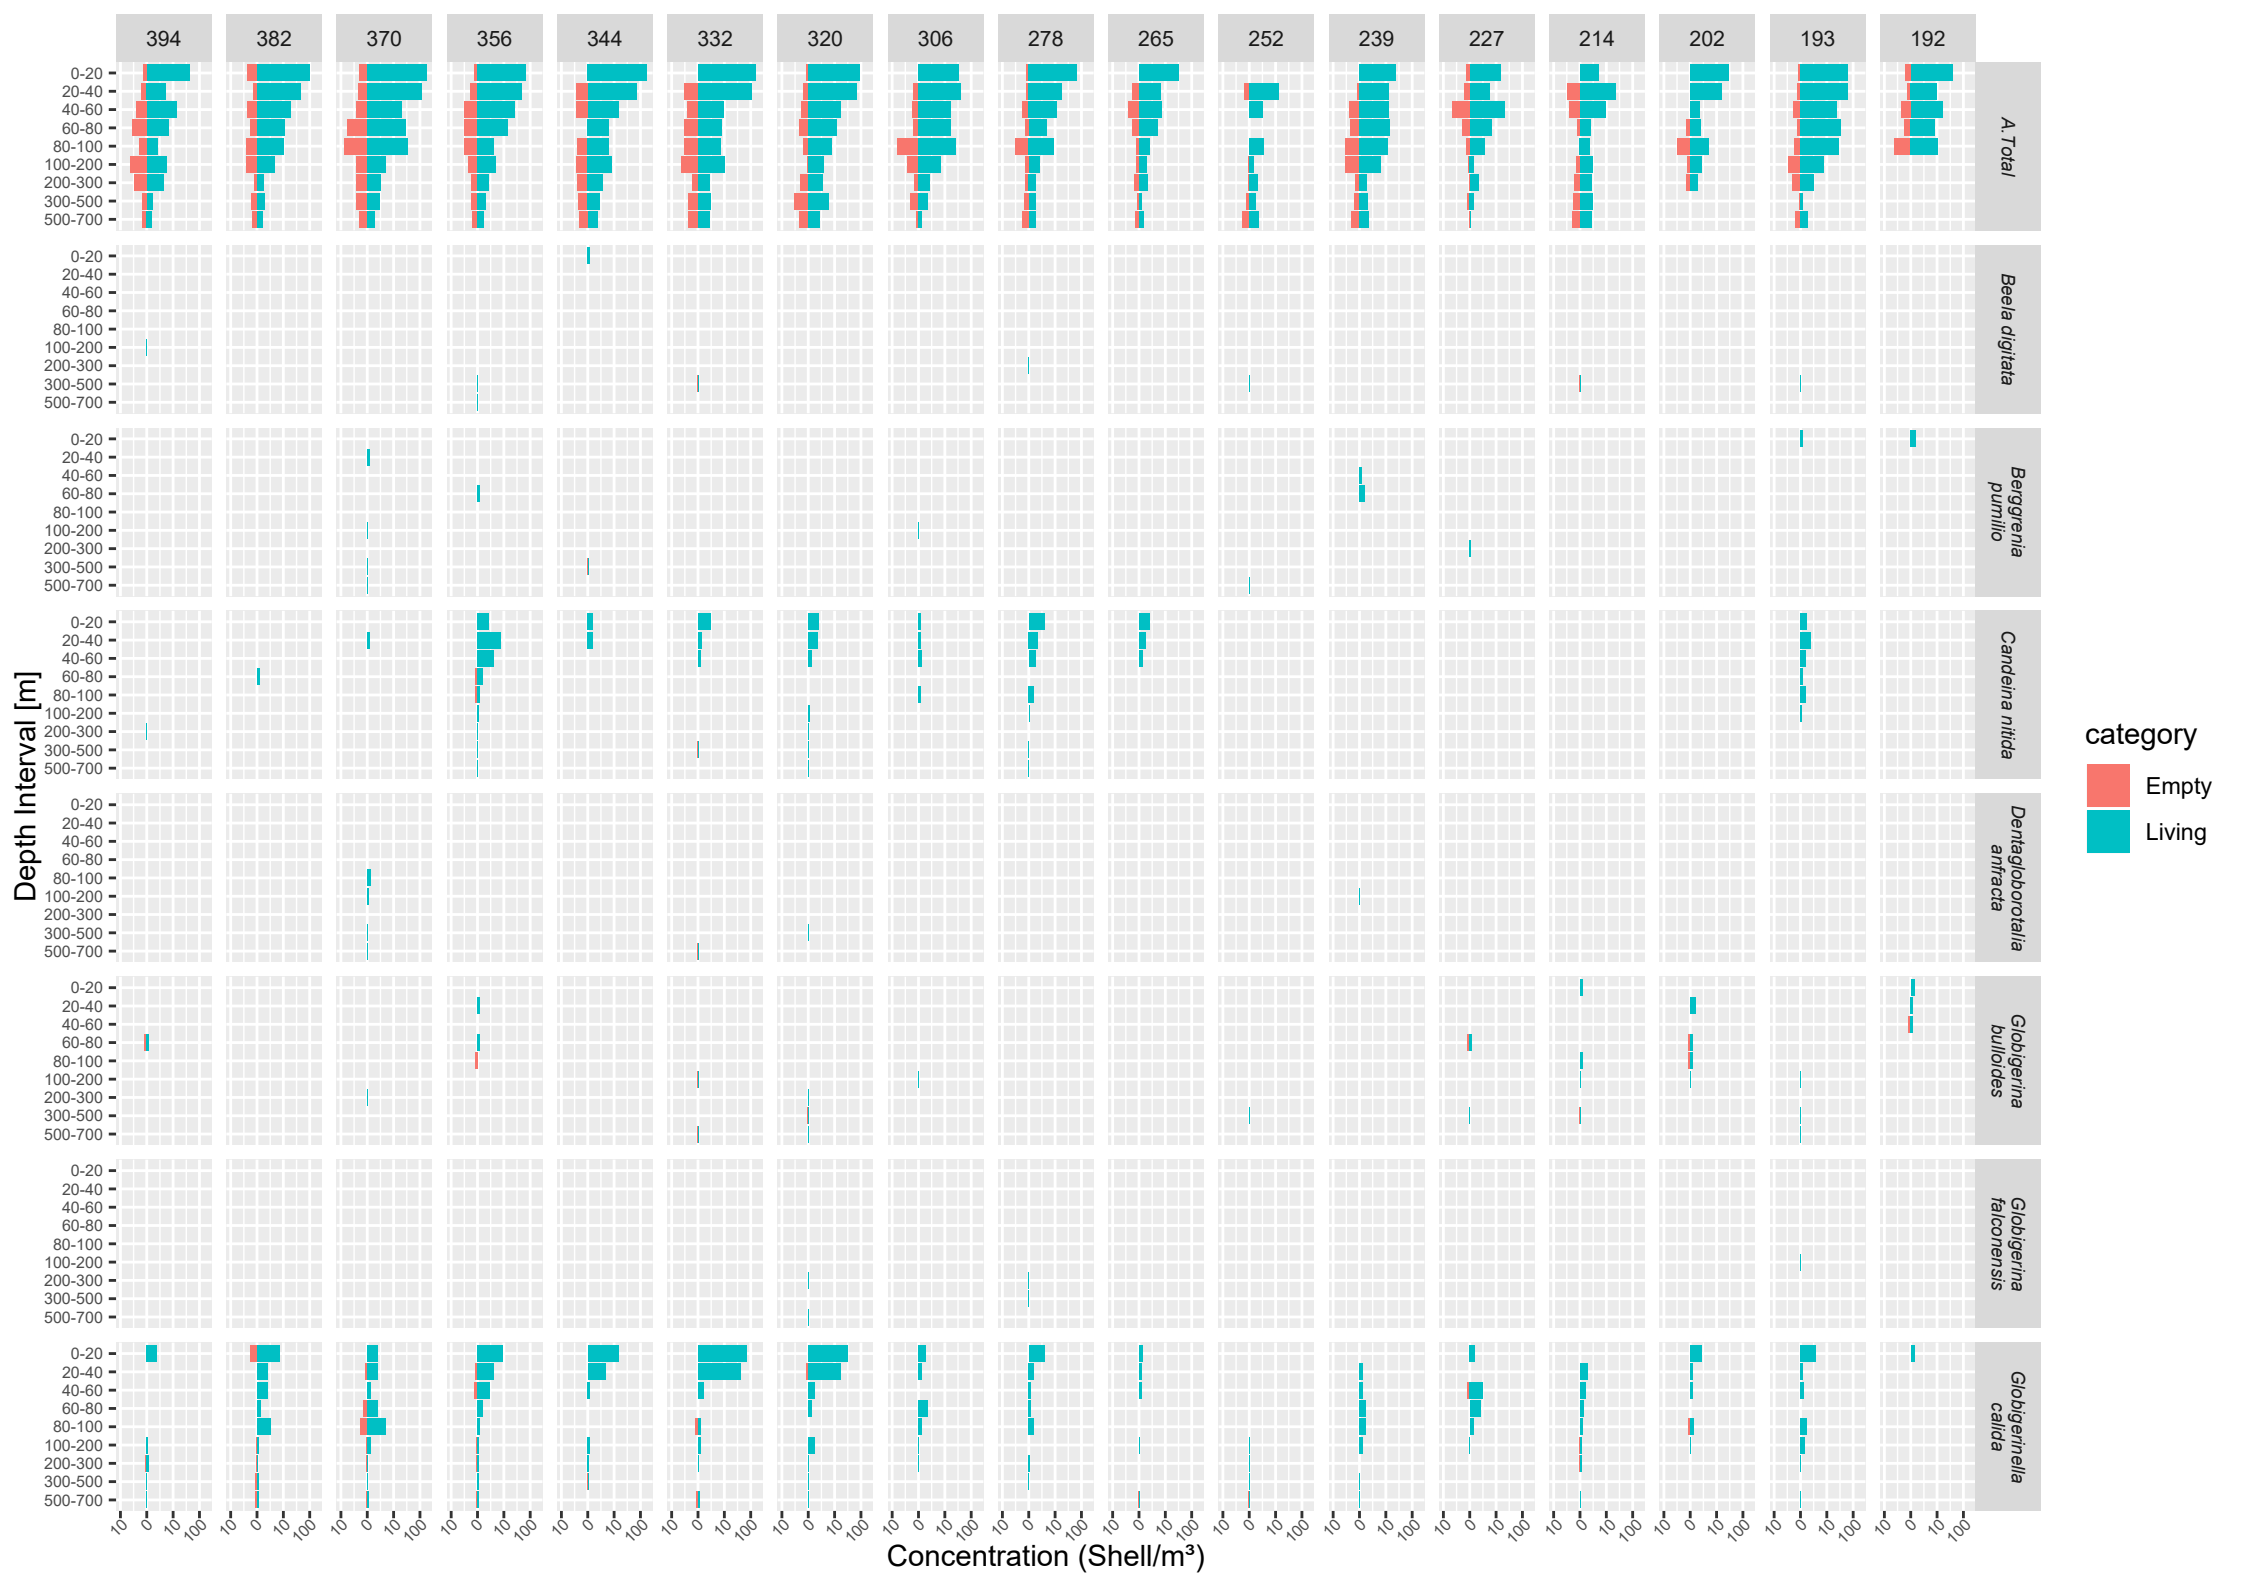

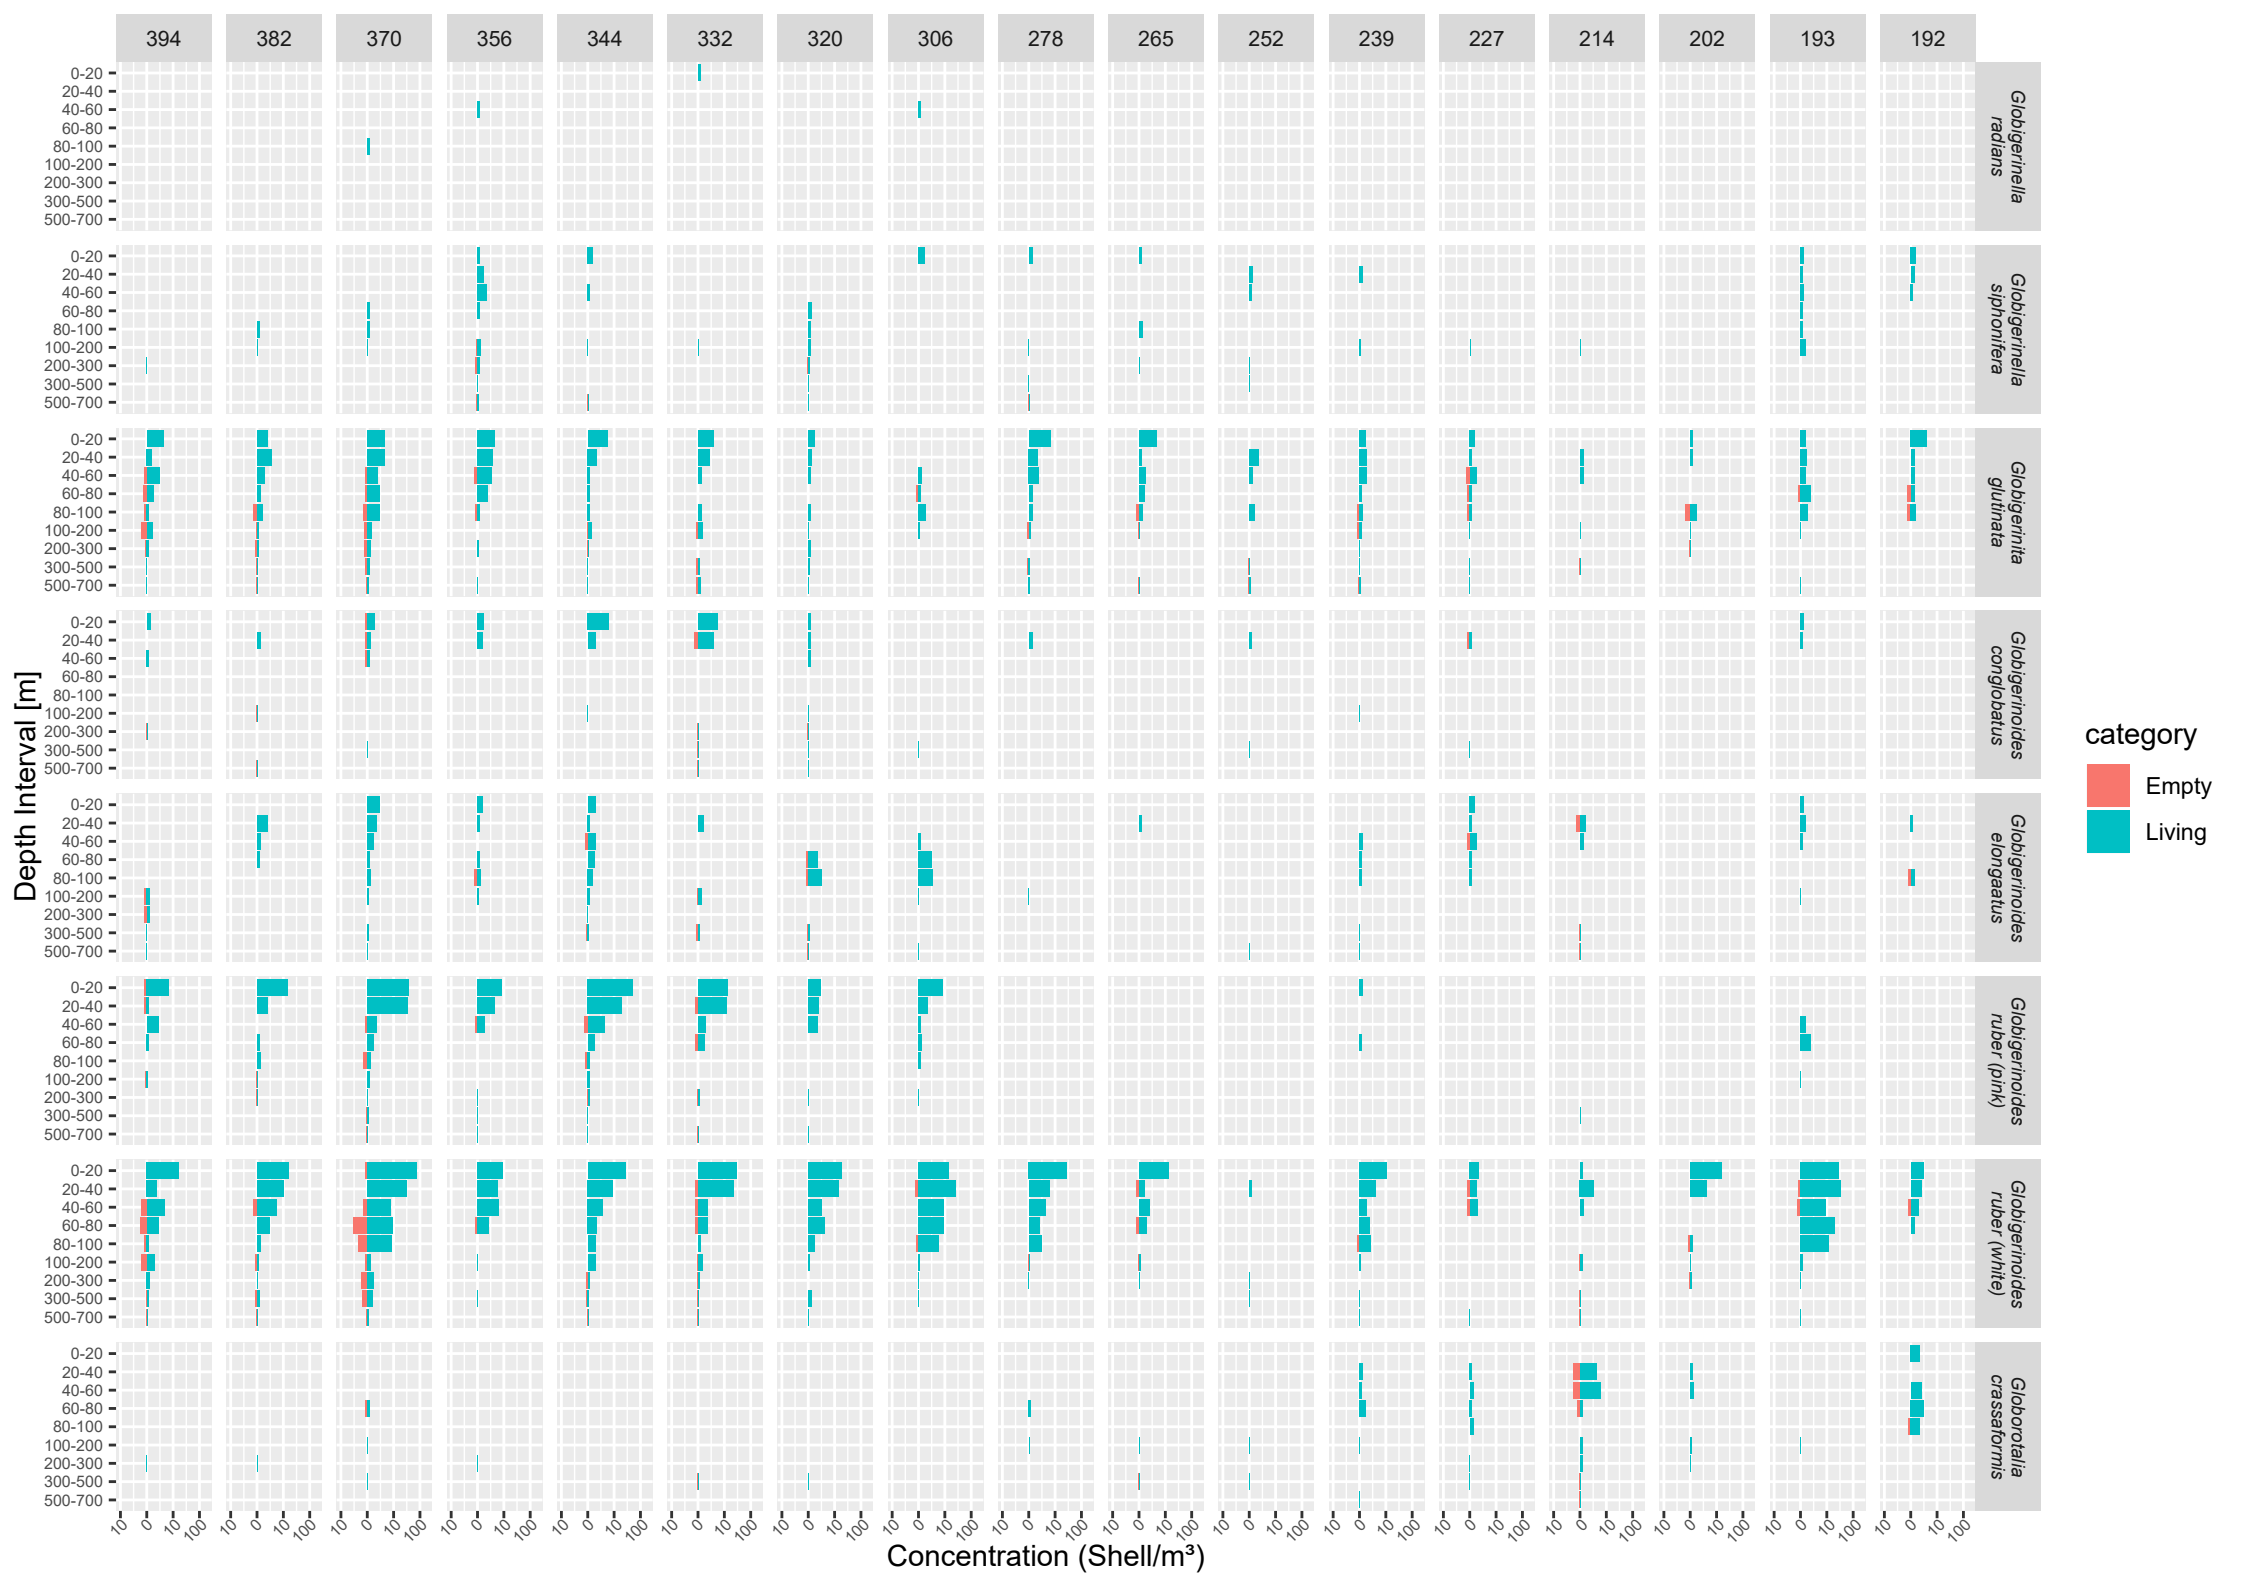

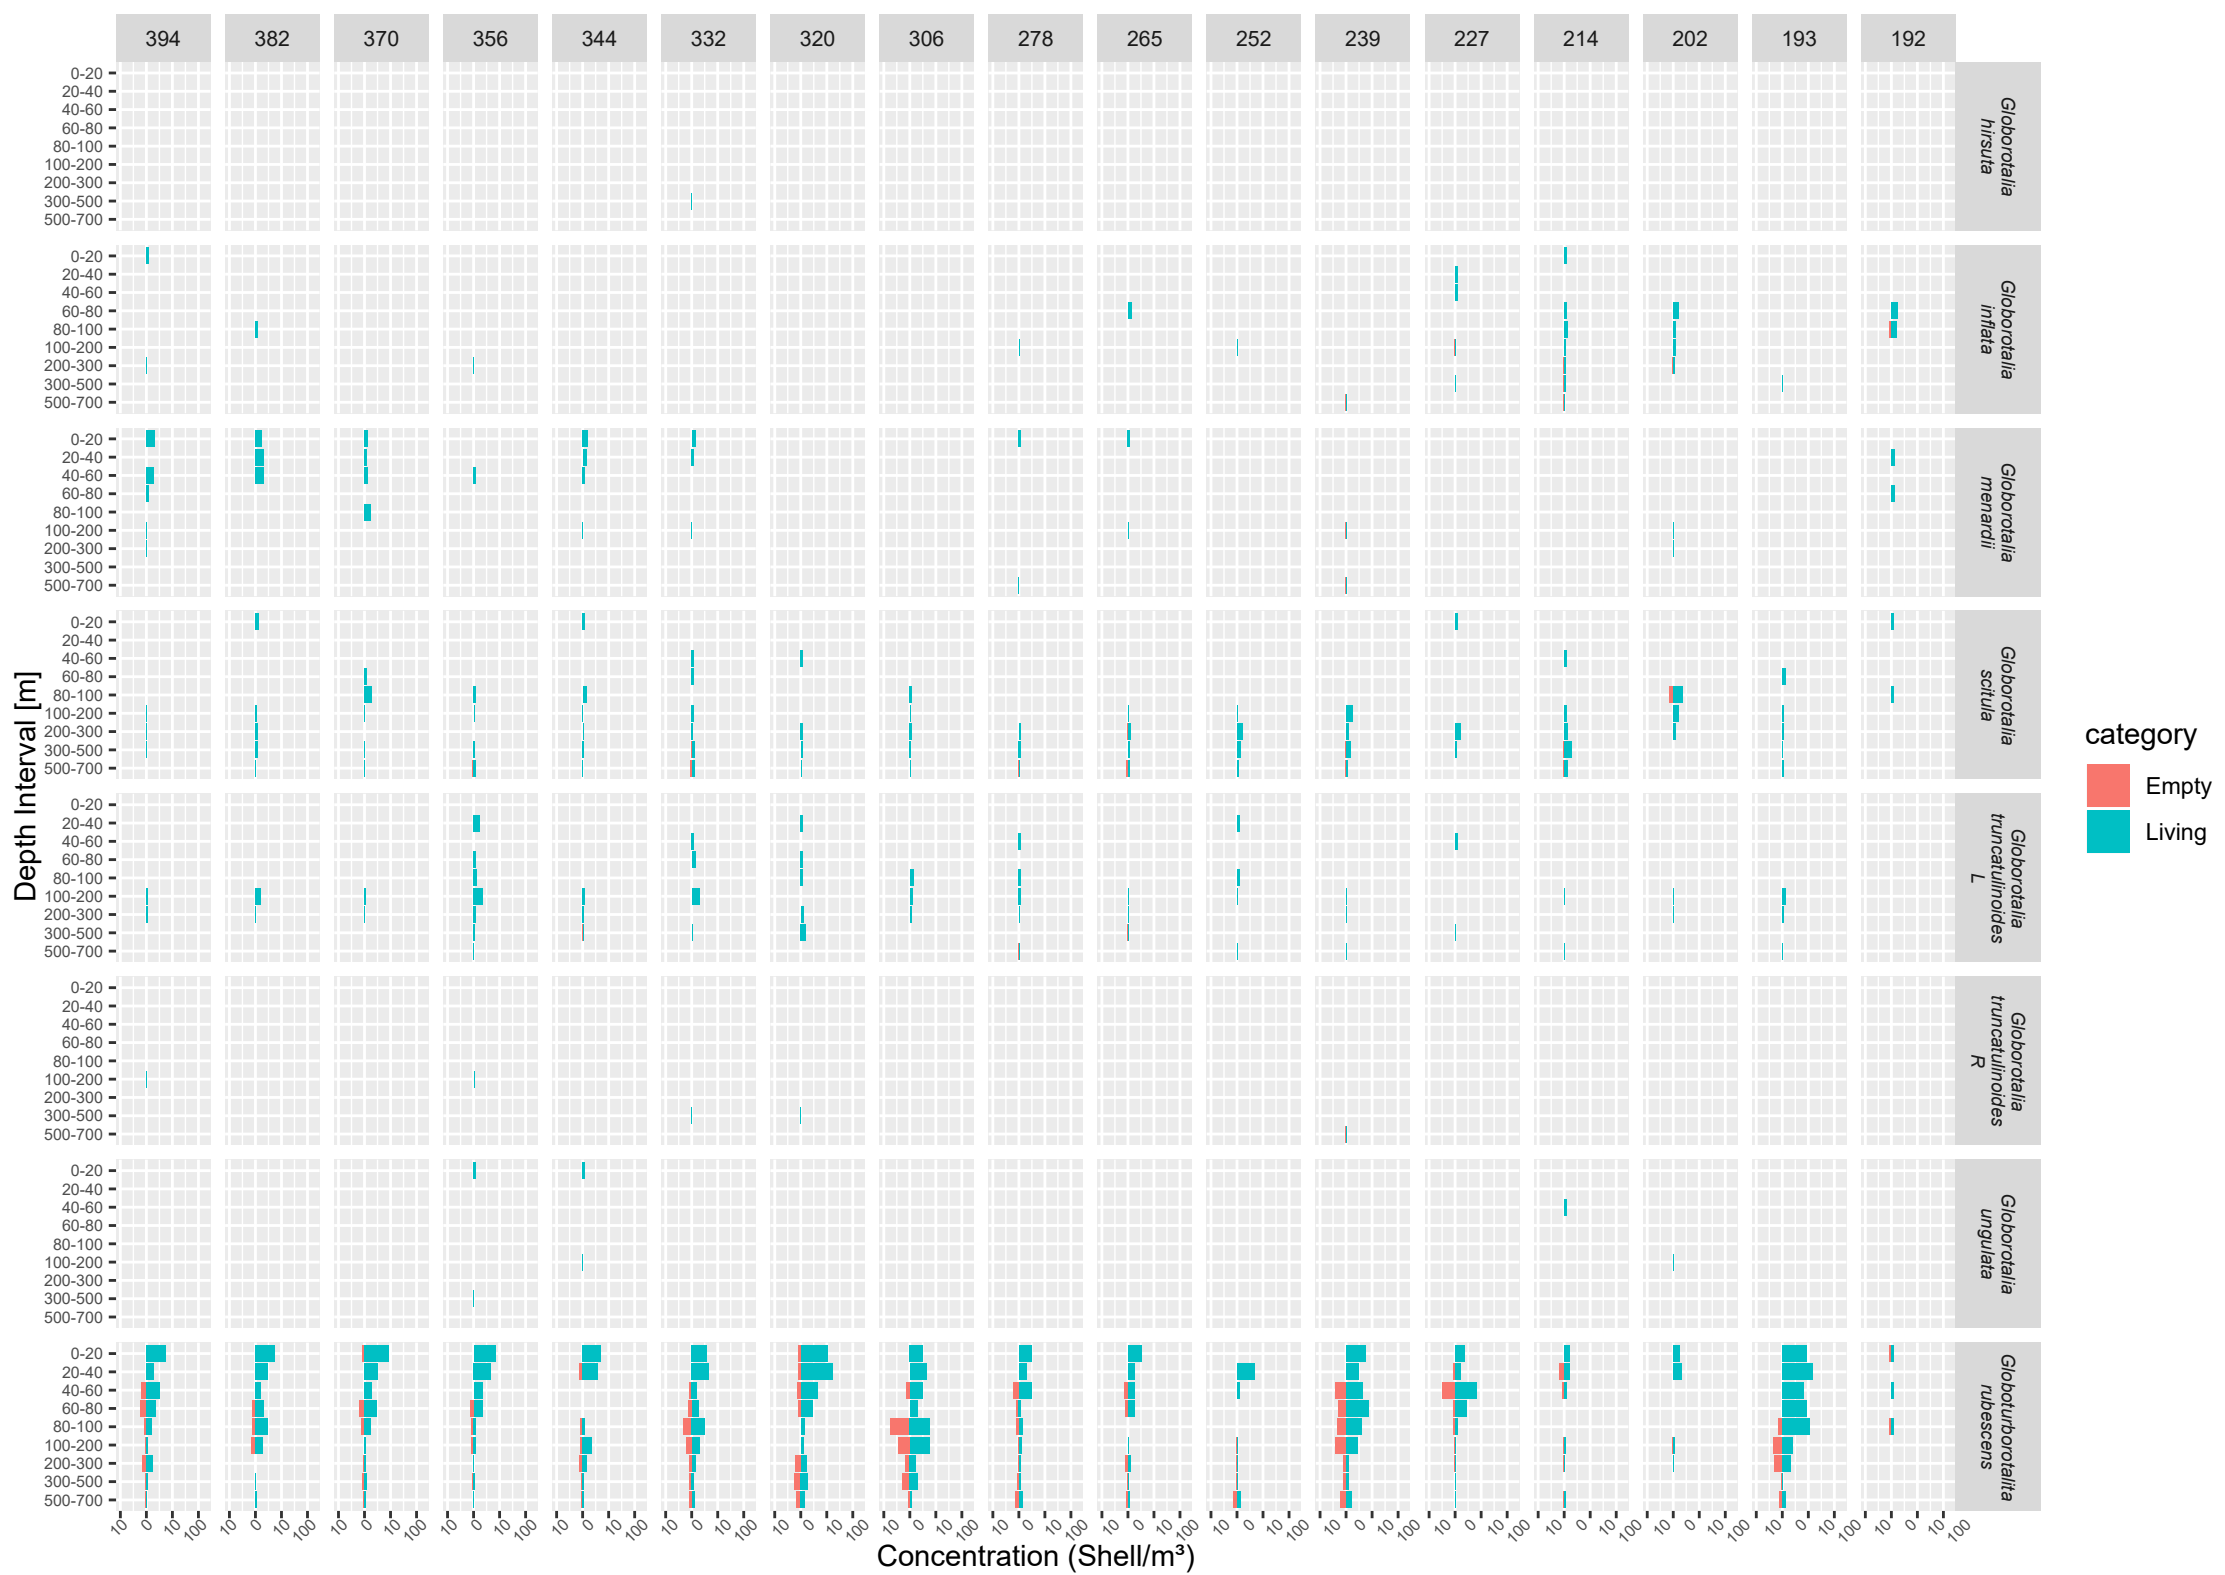

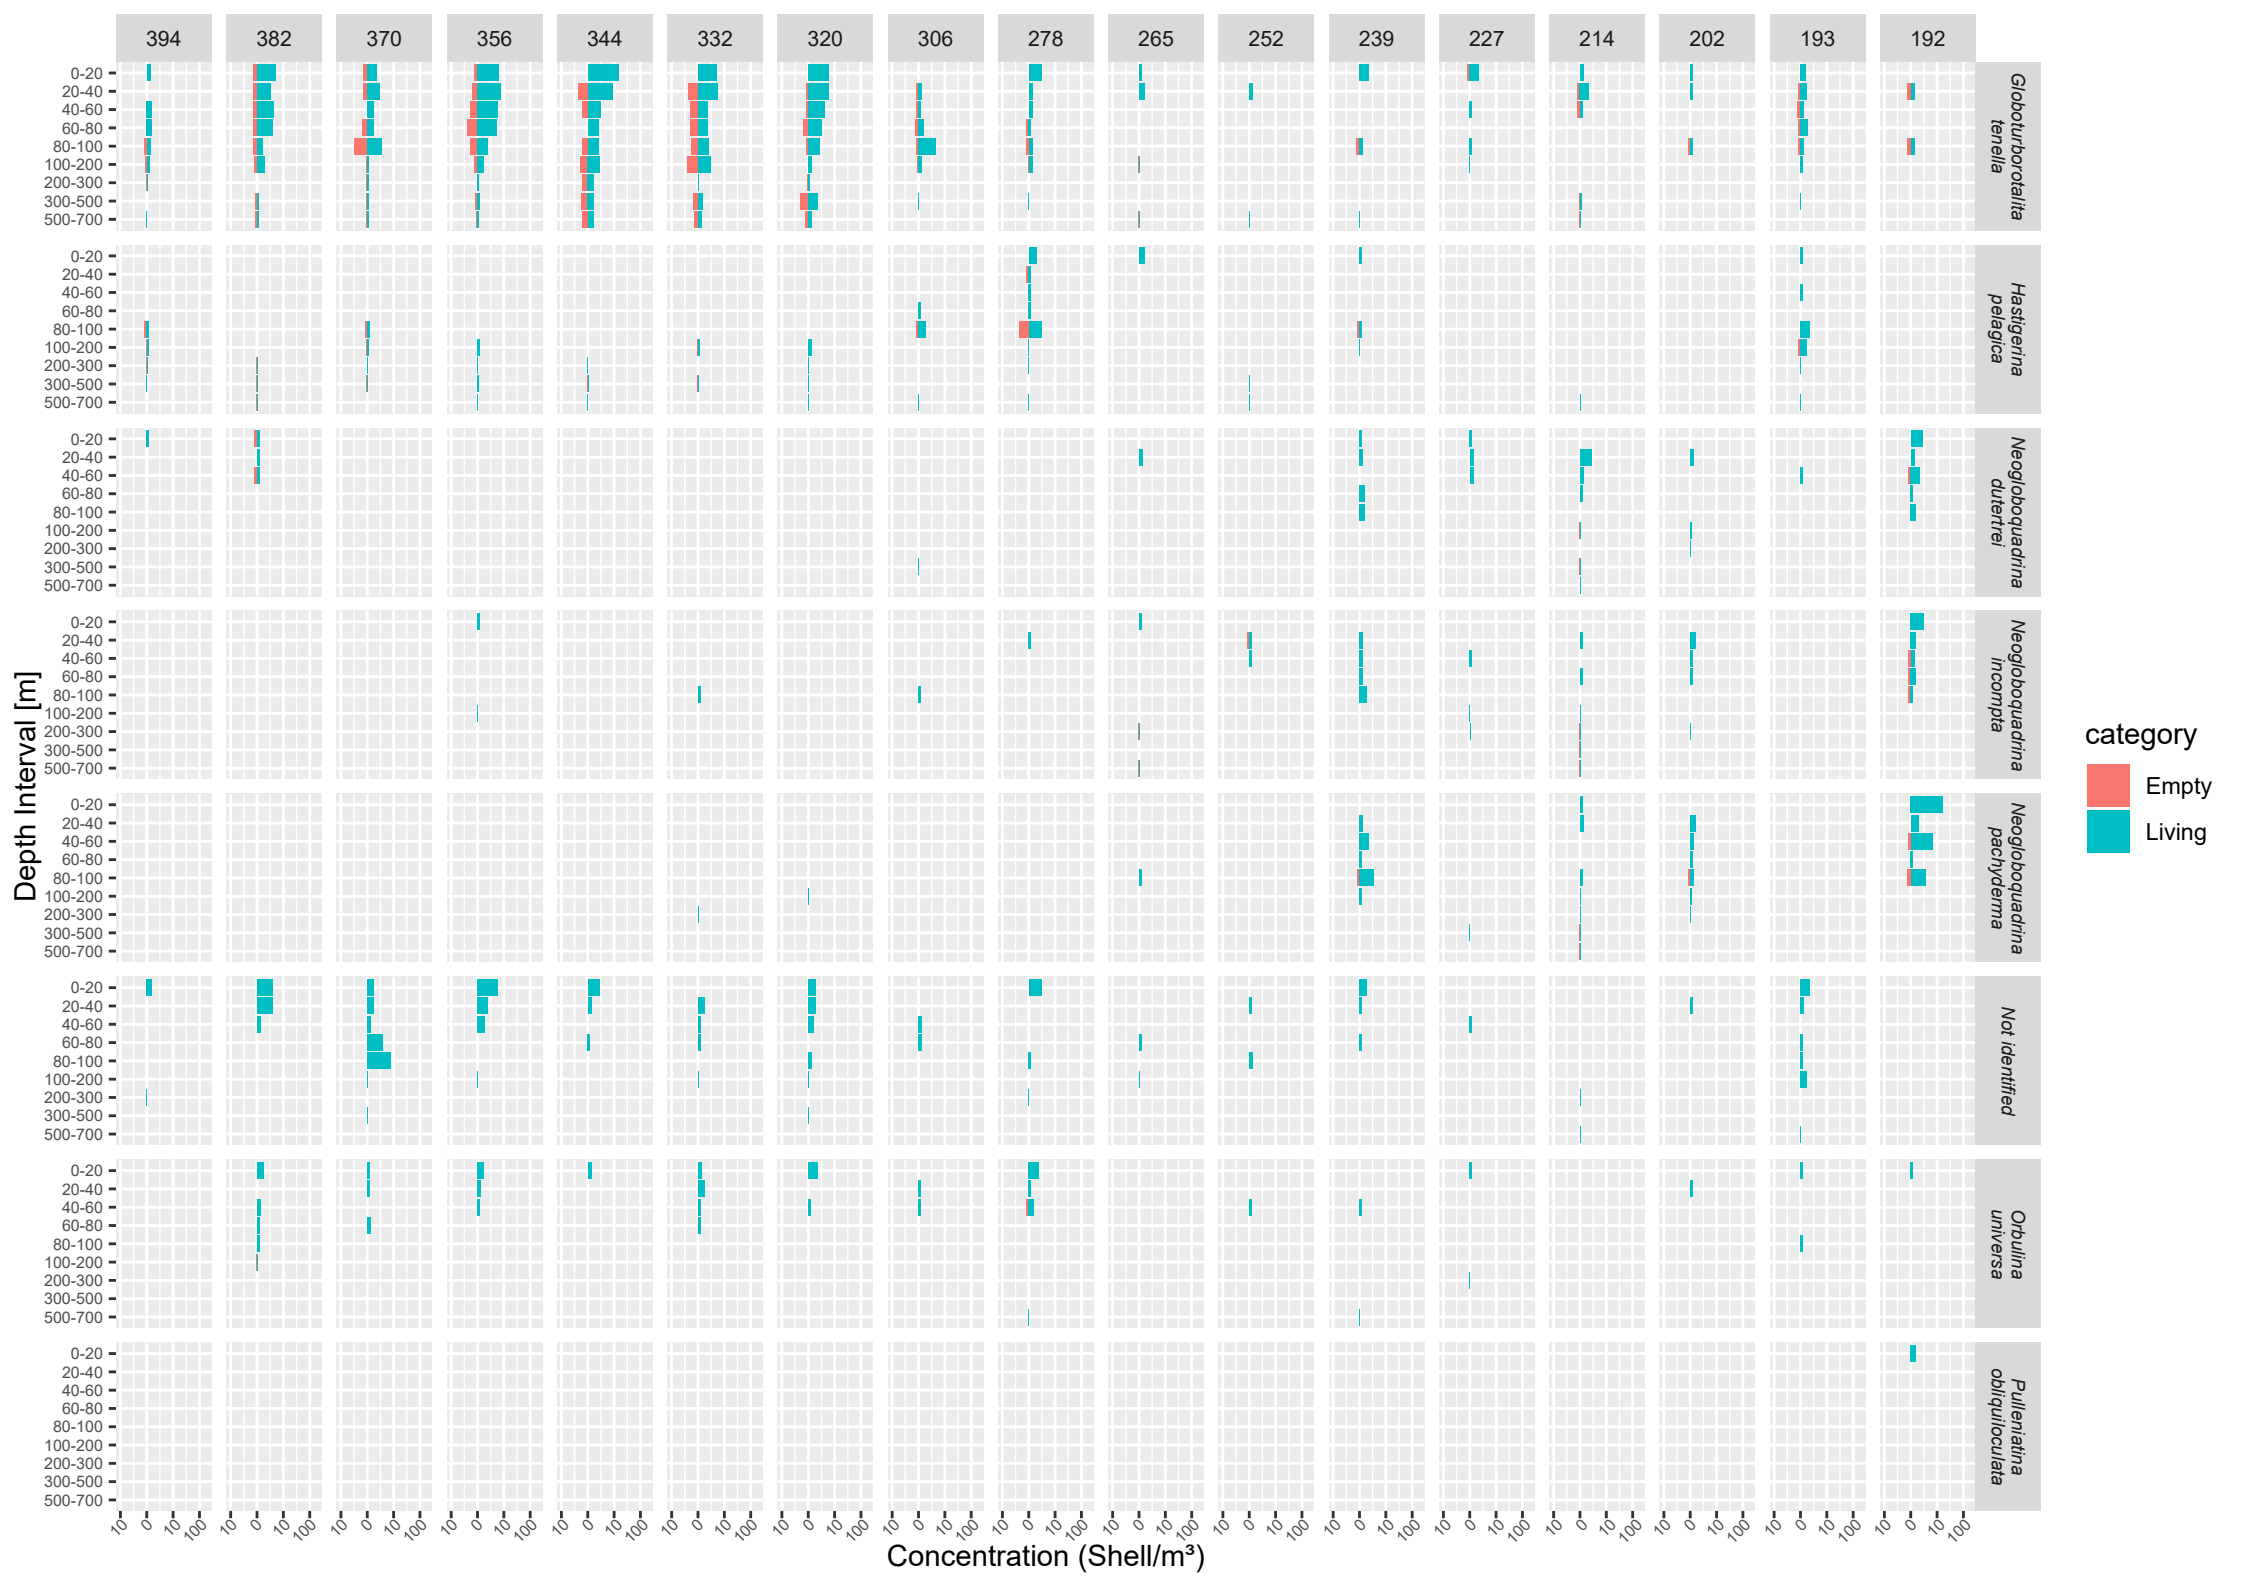

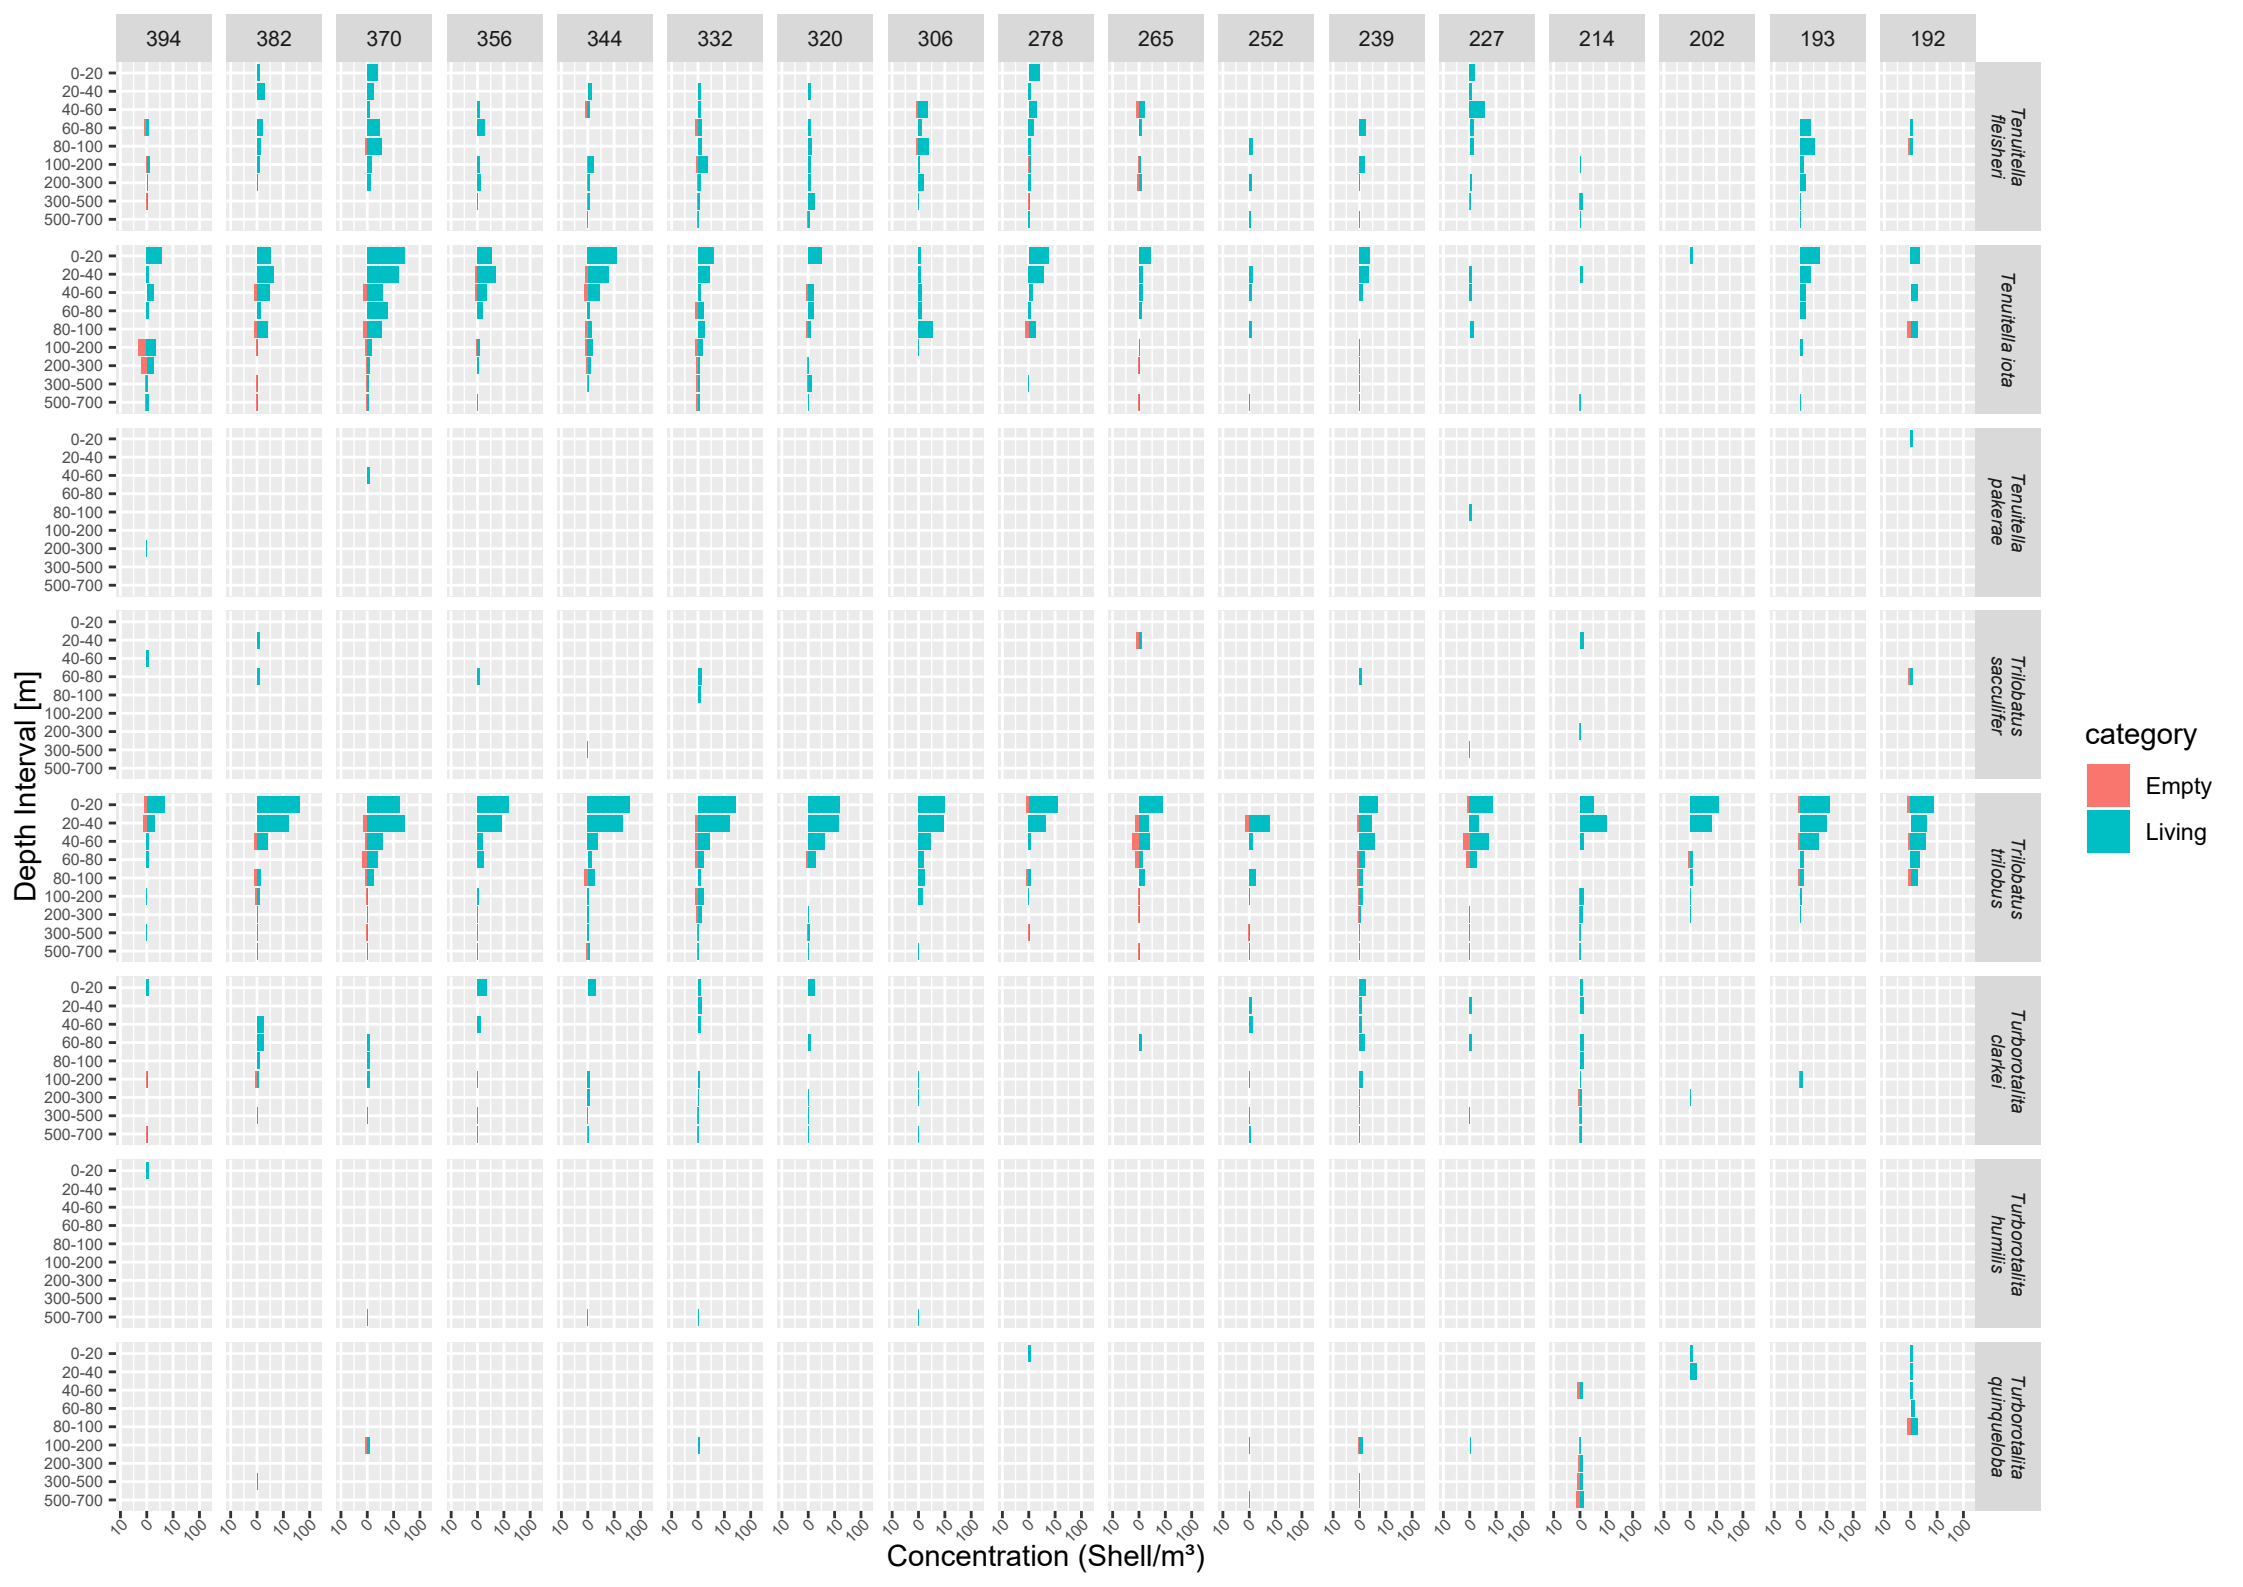

Supplement: Supplementary file 1 [file bg-2019-355-supplement.zip]

# Plate 1

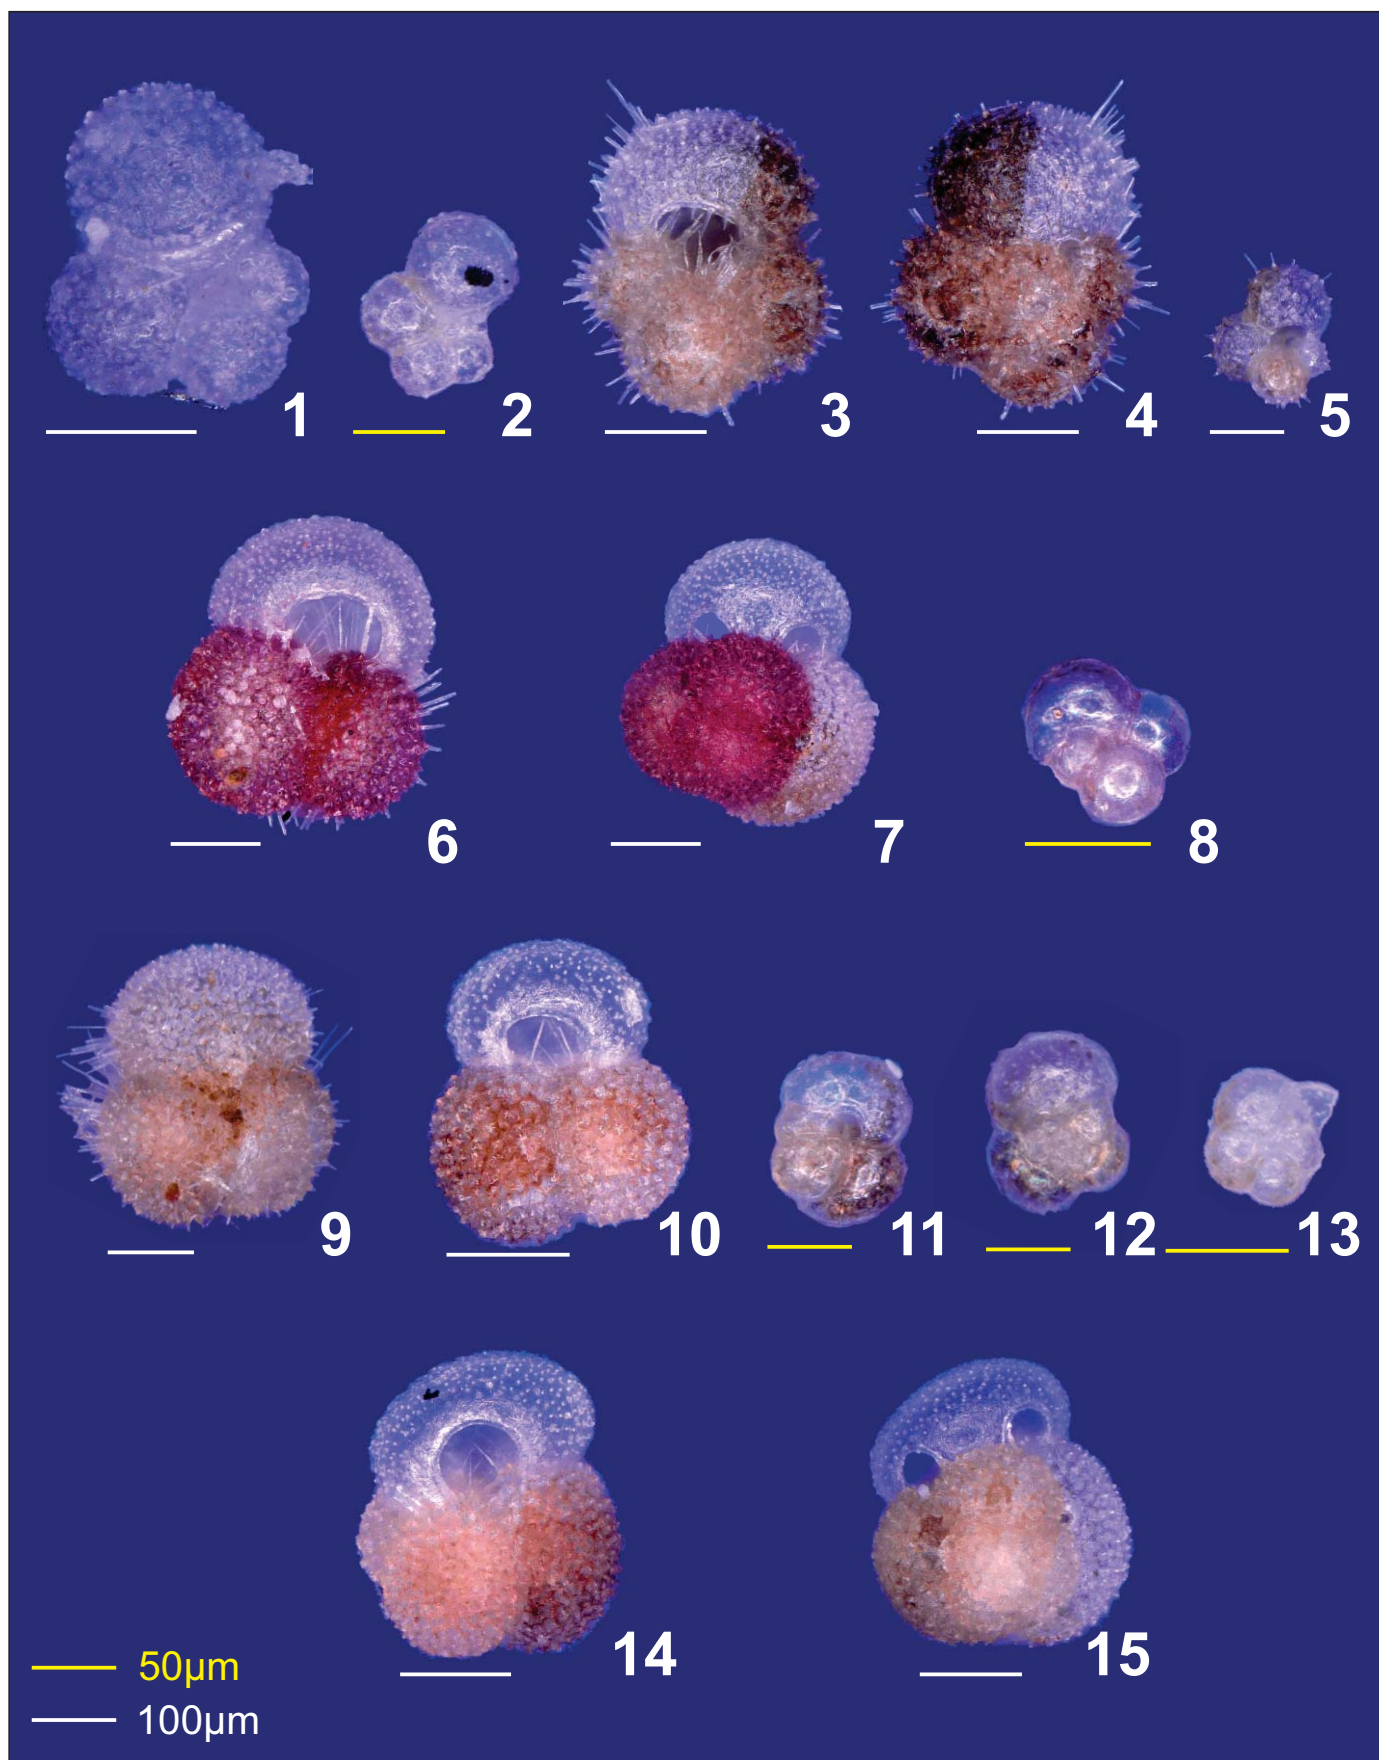

# Plate 2

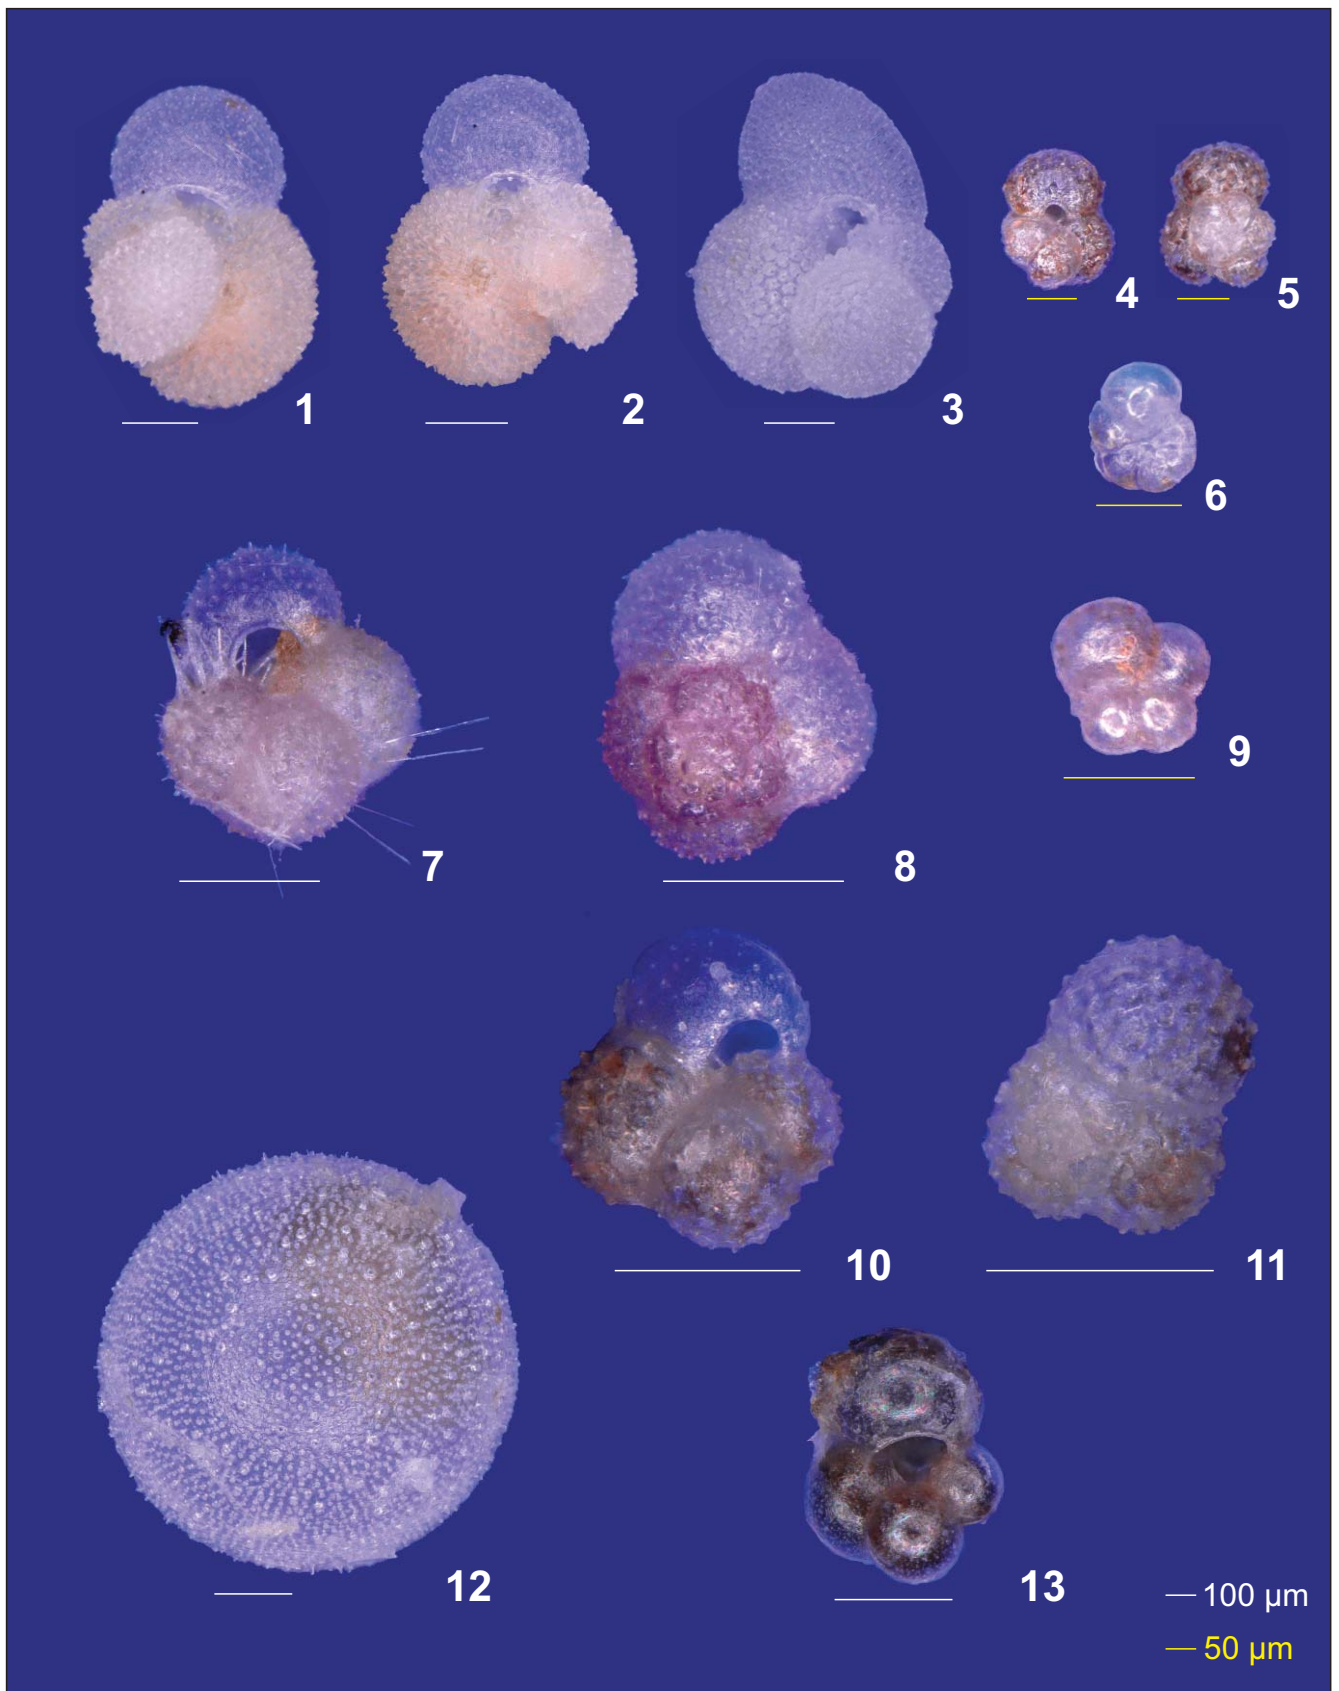

# Plate 3

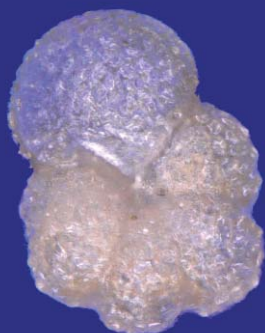

\_\_\_\_\_ 1

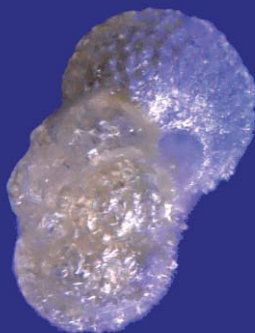

\_\_\_\_\_ 2

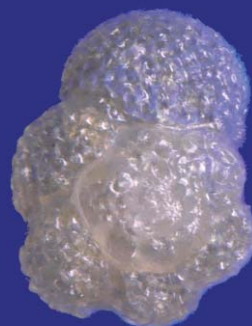

\_\_\_\_\_ 3

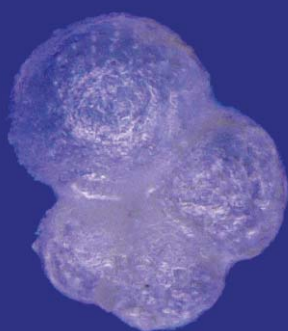

\_\_\_\_\_ 4

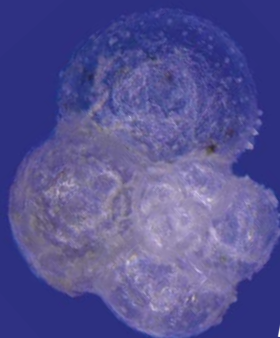

\_\_\_\_\_ 5

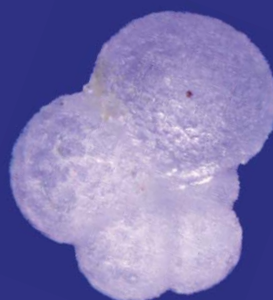

\_\_\_\_\_ 6

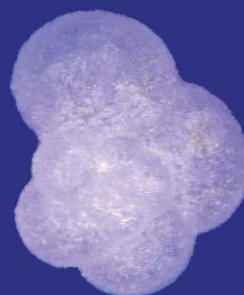

\_\_\_\_\_ 7

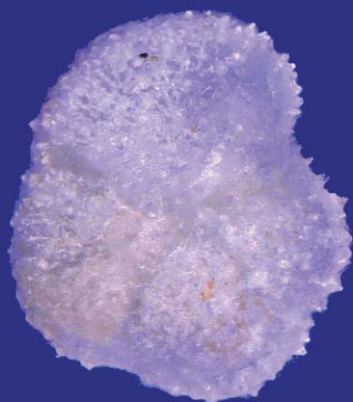

\_\_\_\_\_ 8

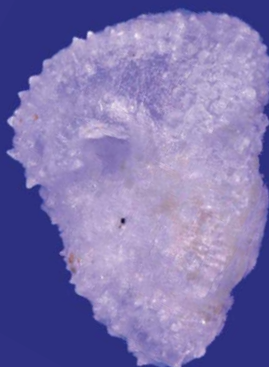

\_\_\_\_\_ 9

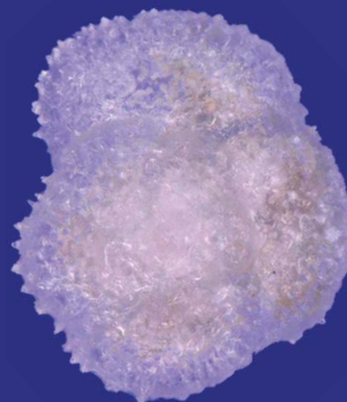

\_\_\_\_\_ 10



# Plate 4

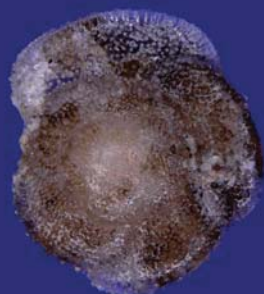

— 1

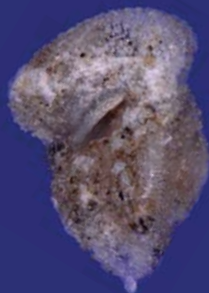

— 2

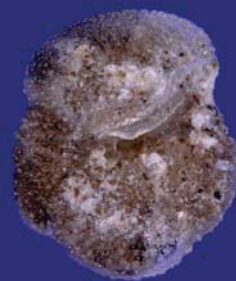

— 3

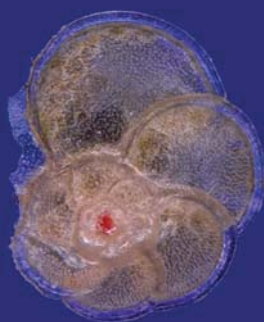

— 4

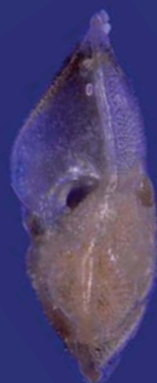

— 5

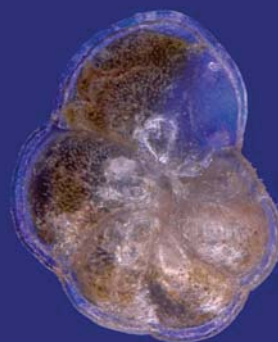

— 6

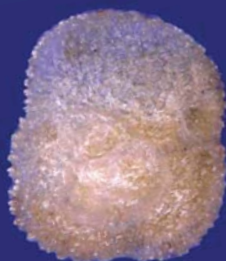

— 7

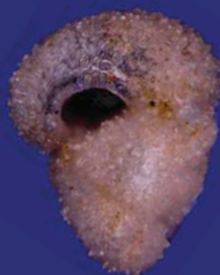

— 8

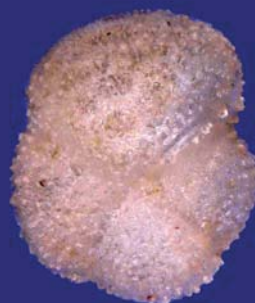

— 9

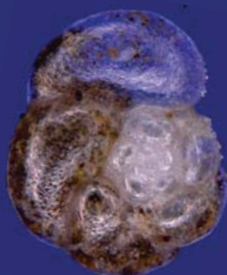

— 10

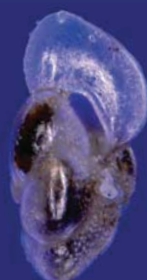

— 11

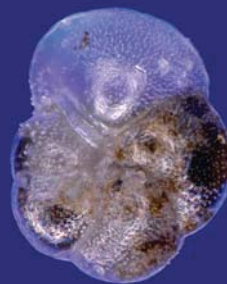

— 12

# Plate 5

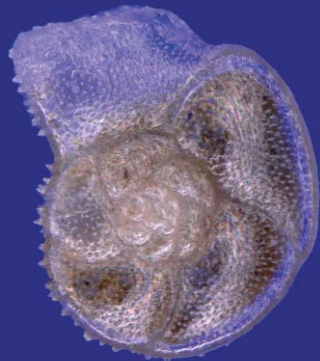

1

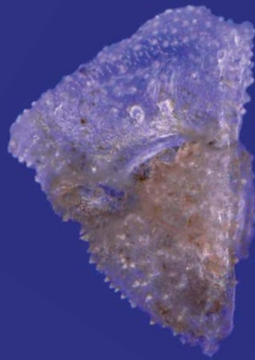

2

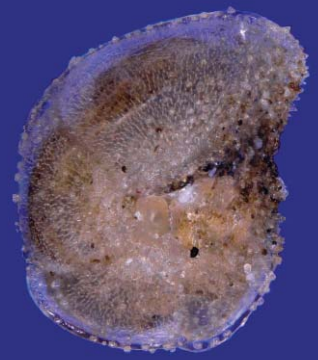

3

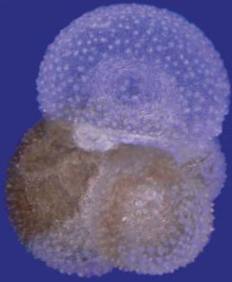

4

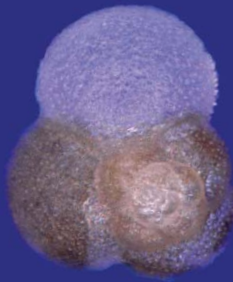

5

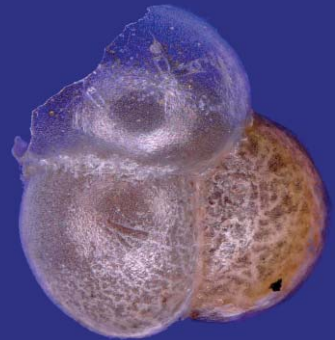

6

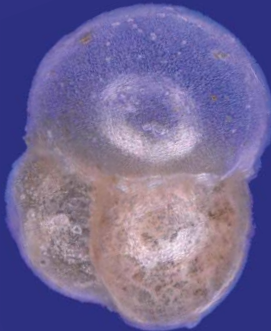

7

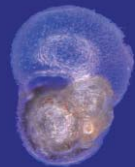

8

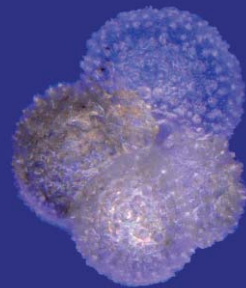

9

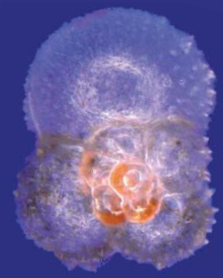

10

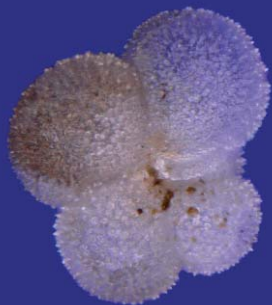

11

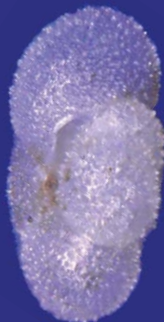

12

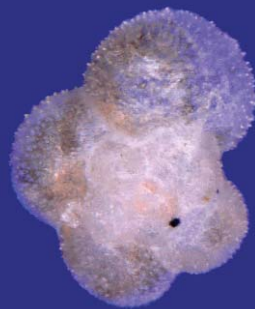

13

Supplement: Supplementary file 2 [file bg-2019-355-supplement.zip]
